# Supplementary material for: Natural products targeting the metabolism of amino acids: from discovery to synthetic development
Source: Royal Society of Chemistry journal article supplement (doi:10.1039/d5np00039d), 2025-01-01
Supplement: d5np00039d1.pdf [file d5np00039d1.pdf]

## Supporting Information

### Natural Products Targeting Amino Acid Metabolism: From Discovery to Synthetic Development

Hyun Su Kim<sup>a,1</sup>, Ahmed H.E. Hassan<sup>b,c,d,1</sup>, Kyuho Moon<sup>b</sup>, Jaehoon Sim<sup>b,c,d,\*</sup>

<sup>a</sup> College of Pharmacy, CHA University, Pocheon-si, Gyeonggi-do 11160, Republic of Korea

<sup>b</sup> College of Pharmacy, Kyung Hee University, Seoul 02447, Republic of Korea

<sup>c</sup> Department of Regulatory Science, Graduate School, Kyung Hee University, Seoul 02447, Republic of Korea

<sup>d</sup> Institute of Regulatory Innovation through Science, Kyung Hee University, Seoul 02447, Republic of Korea

#### List of Contents

**Table S1.** Natural Products-Based Inhibitors Modulating Glutamine Metabolism ..... S1-S5

**Table S2.** Natural Products-Based Inhibitors Modulating Cysteine/Cystine Metabolism ..... S6-S7

**Table S3.** Natural Products-Based Inhibitors Modulating Arginine Metabolism ..... S8-S11

**Table S4.** Natural Products-Based Inhibitors Modulating Tryptophan Metabolism ..... S12-S15



**Table S1.** Natural Products-Based Inhibitors Modulating Glutamine Metabolism

| Enzyme | Structure and Name                                                                                                                                                                                                                                                                                                                                                                                                                          | Natural Source                                                                                                     | Chemical development                                                                                                                                                                                                 | Indication                                   | Ref.  |
|--------|---------------------------------------------------------------------------------------------------------------------------------------------------------------------------------------------------------------------------------------------------------------------------------------------------------------------------------------------------------------------------------------------------------------------------------------------|--------------------------------------------------------------------------------------------------------------------|----------------------------------------------------------------------------------------------------------------------------------------------------------------------------------------------------------------------|----------------------------------------------|-------|
| ASCT2  | 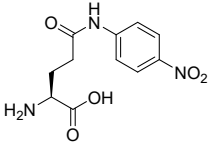 <p><b>2</b><br/>L-γ-Glutamyl-<i>p</i>-nitroanilide (GPNA)</p>                                                                                                                                                                                                                                                                                             |  <p><b>1</b><br/>L-Glutamine</p> | Decreasing pKa of the amide proton; Enhancing binding affinity                                                                                                                                                       | C6 rat glioma cells (in-vitro)               | 88    |
|        |  <p><b>3</b><br/>N-(2-(Morpholinomethyl)phenyl)-L-glutamine</p>                                                                                                                                                                                                                                                                                            |                                                                                                                    | Improving inhibition of glutamine uptake (3-fold than GPNA)                                                                                                                                                          | HEK293 cells (in-vitro)                      | 89    |
|        |  <p><b>4</b><br/>2-Amino-4-<i>bis</i>(2-((3-methylbenzyl)oxy)benzyl)aminobutanoic acid (V-9302)</p>                                                                                                                                                                                                                                                       |                                                                                                                    | Improving inhibition of glutamine uptake (100-fold than GPNA)                                                                                                                                                        | Colorectal cancer (in vivo)                  | 90-92 |
|        |  <p><b>5a:</b> R<sub>1</sub> = Cl, R<sub>2</sub> = H<br/><b>5b:</b> R<sub>1</sub> = H, R<sub>2</sub> = <i>tert</i>-Bu</p> <p>2-Amino-4-<i>bis</i>(2-((3-(4-chlorophenyl)prop-2-yn-1-yl)oxy)benzyl)aminobutanoic acid (<b>5a</b>)<br/>2-Amino-4-<i>bis</i>(5-(<i>tert</i>-butyl)-2-((3-phenylprop-2-yn-1-yl)oxy)benzyl)aminobutanoic acid (<b>5b</b>)</p> |                                                                                                                    | Enhancing selectivity for ASCT2; Improving inhibition of glutamine uptake, microsomal stability, and bioavailability; Suppressing tumor growth in an A549 xenograft model, with higher tumor growth inhibition (TGI) | Non-small-cell lung cancer (NSCLC) (in vivo) | 93    |

|       |                                                                                                                                                                                                   |                                                                                                               |                                                                                                |                                 |        |
|-------|---------------------------------------------------------------------------------------------------------------------------------------------------------------------------------------------------|---------------------------------------------------------------------------------------------------------------|------------------------------------------------------------------------------------------------|---------------------------------|--------|
| ASCT2 | 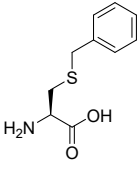<br><b>8</b><br><i>S</i> -Benzyl-L-cysteine                                                                      | <br><b>6</b><br>L-Cysteine   | First ASCT2 inhibitor                                                                          | HEK293 cells (in-vitro)         | 94     |
|       | <br><b>9</b><br><i>O</i> -Benzyl-L-serine                                                                        |                                                                                                               | First ASCT2 inhibitor                                                                          | MCF-7 cells (in-vitro)          | 94, 95 |
|       | <br><b>10</b><br><i>O</i> -(4-Phenylbenzoyl)-L-serine                                                            | <br><b>7</b><br>L-Serine     | Enhancing apparent affinity ( $K_m = 30 \mu\text{M}$ )                                         | HEK293 cells (in-vitro)         | 96     |
|       | <br><b>12</b><br>(2 <i>S</i> ,4 <i>R</i> )-4-(2-Fluorophenethyl)pyrrolidine-2-carboxylic acid ( $\gamma$ -FBP) |                                                                                                               | First proline analogue ASCT2 inhibitor; Enhancing apparent affinity ( $K_m = 87 \mu\text{M}$ ) | C8161 melanoma cells (in-vitro) | 97     |
|       | <br><b>13</b><br>( <i>R</i> )- $\gamma$ -(4-Biphenylmethyl)-L-proline                                          | <br><b>11</b><br>L-Proline | Enhancing apparent binding affinity ( $K_i = 3 \mu\text{M}$ )                                  | HEK293 cells (in-vitro)         | 98     |

|       |                                                                                                                                                                                                             |                                                                                                                                                        |                                                                                                                    |                                                          |     |
|-------|-------------------------------------------------------------------------------------------------------------------------------------------------------------------------------------------------------------|--------------------------------------------------------------------------------------------------------------------------------------------------------|--------------------------------------------------------------------------------------------------------------------|----------------------------------------------------------|-----|
| ASCT2 | 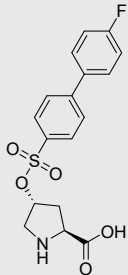 <p><b>14</b><br/>(2<i>S</i>,4<i>R</i>)-4-(((4'-Fluoro-[1,1'-biphenyl]-4-yl)sulfonyl)oxy)pyrrolidine-2-carboxylic acid</p> |  <p><b>11</b><br/>L-Proline</p>                                       | Enhancing apparent binding affinity ( $K_i = 8.07 \mu\text{M}$ )                                                   | HEK293 cells (in-vitro)                                  | 99  |
|       |  <p><b>15</b><br/>L-<i>cis</i>-Hydroxyproline biphenyl-4-carboxylate ester (Lc-BPE)</p>                                    |                                                                                                                                                        | Stereospecific inhibition; Enhancing apparent binding affinity ( $K_i = 0.86 \mu\text{M}$ )                        | HEK293 cells (in-vitro)                                  | 100 |
| GLS   |  <p><b>17</b><br/>Methyl-POM-DON-isopropyl-ester</p>                                                                      |  <p><b>16</b><br/>(<i>S</i>)-6-Diazo-5-oxo-L-nor leucine (DON)</p> | Improving chemical and metabolic stability; Enhancing cerebrospinal fluid (CSF)-to-plasma ratio (10-fold than DON) | Glioblastoma multiforme (GBM) (in vivo)                  | 101 |
|       |  <p><b>18</b><br/>Isopropyl 6-Diazo-5-oxo-2-(((phenyl(pivaloyloxy)methoxy)carbonyl)amino)hexanoate</p>                   |                                                                                                                                                        | Enhancing CSF-to-plasma ratio and brain-to-plasma ratio (15-fold and 9-fold than DON)                              | HIV-associated neurocognitive disorders (HAND) (in vivo) | 102 |

|     |                                                                                                                                                                                                                                |                                                                                                                                                      |                                                                                                                                  |                                                                                                                                                           |         |
|-----|--------------------------------------------------------------------------------------------------------------------------------------------------------------------------------------------------------------------------------|------------------------------------------------------------------------------------------------------------------------------------------------------|----------------------------------------------------------------------------------------------------------------------------------|-----------------------------------------------------------------------------------------------------------------------------------------------------------|---------|
| GLS | 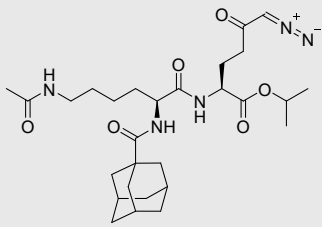 <p><b>19</b><br/>Isopropyl 2-(6-Acetamido-2-(2-acetyl-1,2,3,4-tetrahydroisoquinoline-3-carboxamido)hexanamido)-6-diazo-5-oxohexanoate</p>    |                                                                                                                                                      | Enhancing tumor cell-to-plasma ratio (55-fold than DON); Enhancing tumor exposure in plasma and GI (5-fold and 11-fold than DON) | Lymphoma (in vivo)                                                                                                                                        | 103     |
|     |  <p><b>20</b><br/>Ethyl 2-(2-Amino-4-methylpentanamido)-6-diazo-5-oxohexanoate (JHU083)</p>                                                   |  <p><b>16</b><br/>(<i>S</i>)-6-Diazo-5-oxo-L-nor leucine (DON)</p> | Orally bioavailable<br>Reducing the generation of MDSCs                                                                          | MYC-expressing medulloblastoma, IDH1 mutation glioma, Thyroid cancer (in vivo)                                                                            | 104-107 |
|     |  <p><b>21</b><br/>Isopropyl (<i>S</i>)-2-((<i>S</i>)-2-acetamido-3-(1<i>H</i>-indol-3-yl) propanamido)-6-diazo-5-oxohexanoate (DRP-104)</p> |                                                                                                                                                      | Enhancing tumor exposure in plasma and GI (6-fold and 11-fold than DON)                                                          | Pancreatic ductal adenocarcinoma (PDAC), castration-resistant prostate cancer (CRPC), lung cancer (in vivo)<br>Clinical trials; NCT 06027086 (Recruiting) | 108-111 |

|       |                                                                                                                                                                                                                            |                                                                                                                                                      |                                                                                                                                                           |                                                                                                        |              |
|-------|----------------------------------------------------------------------------------------------------------------------------------------------------------------------------------------------------------------------------|------------------------------------------------------------------------------------------------------------------------------------------------------|-----------------------------------------------------------------------------------------------------------------------------------------------------------|--------------------------------------------------------------------------------------------------------|--------------|
| GLS   | 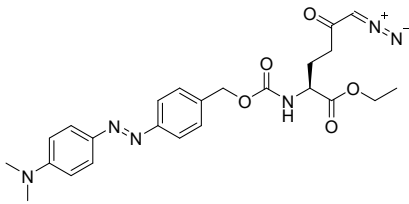 <p><b>22</b><br/>Ethyl (<i>E</i>)-6-diazo-2-((((4-(dimethylamino)phenyl)diazenyl)benzyl)oxy)carbonyl)amino)-5-oxohexanoate (Azo-DON)</p> |  <p><b>16</b><br/>(<i>S</i>)-6-Diazo-5-oxo-L-nor leucine (DON)</p> | Hypoxic-activated prodrug of DON;<br>TSR of 84.2 % in hepatoma cancer (monotherapy);<br>TSR of 96.6 % in colon cancer (combination with CBP)              | Hepatoma cancer, colon cancer (in vivo)                                                                | 112          |
|       |  <p><b>23</b><br/>Ethyl (<i>S</i>)-6-diazo-5-oxo-2-(((2-(pyridin-2-yl)disulfaneyl)ethoxy)carbonyl)amino)hexanoate (redox-DON)</p>         |                                                                                                                                                      | Redox-responsive prodrug of DON;<br>Improved safety profile than JHU083                                                                                   | Colon cancer (in vivo)                                                                                 | 113          |
| GLUD1 |  <p><b>25</b><br/>2-Allyl-1-hydroxyanthracene-9,10-dione (R162)</p>                                                                      |  <p><b>24</b><br/>Purpurin</p>                                    | Improving potency and specificity for GLUD1 inhibition;<br>Enhancing the cell-permeability;<br>Attenuating cancer cell proliferation and tumor metastasis | Lung cancer, breast cancer, LKB1-deficient lung cancer<br>Non-small-cell lung cancer (NSCLC) (in vivo) | 38, 114, 115 |

**Table S2.** Natural Products-Based Inhibitors Modulating Cysteine/Cystine Metabolism

| Enzyme | Structure and Name                                                                                                                                       | Natural Source                                                                                                             | Chemical development                                                                                                                                                                      | Indication                                                                       | Ref.    |
|--------|----------------------------------------------------------------------------------------------------------------------------------------------------------|----------------------------------------------------------------------------------------------------------------------------|-------------------------------------------------------------------------------------------------------------------------------------------------------------------------------------------|----------------------------------------------------------------------------------|---------|
| CBS    | 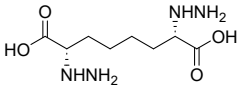 <p><b>27</b><br/><math>\alpha</math>-(L,L)-bis-hydrazino acid (6S)</p> |  <p><b>26</b><br/>(L,L)-Cystathionine</p> | Enhancing apparent binding affinity ( $K_i = 48 \mu\text{M}$ ); Reduction of infarct volume with an 83% at 30 min prior-stroke treatment and a 66% reduction at 1 h post-stroke treatment | transient middle cerebral artery occlusion (tMCAO) for ischemic stroke (In vivo) | 158     |
|        |  <p><b>29</b><br/>L-Buthionine sulfoximine (BSO)</p>                    |                                                                                                                            | Enhancing inhibiting potency (100-fold than MSO); Decreasing renal GSH levels in mice (<20% of the control level)                                                                         | melanoma, multiple myeloma (MM), neuroblastoma (In vivo)                         | 159-164 |
| GCL    |  <p><b>28</b><br/>L-Methionine</p>                                    |                                                                                                                            | Enhancing binding, cellular potency and effectively inducing ferroptosis <i>in vitro</i>                                                                                                  | canine cancer cell lines (In vivo)                                               | 165     |
|        |  <p><b>31</b><br/>(KOJ-2)</p>                                         |                                                                                                                            | Ester removal allowed enhanced GCL inhibition, potent ferroptosis induction in cells, and improved bioavailability upon oral administration                                               | HT1080 xenograft-nude mice model                                                 | 165     |



|                            |                                                                                                                                           |                                                                                                                        |                                                                                                            |                                              |     |
|----------------------------|-------------------------------------------------------------------------------------------------------------------------------------------|------------------------------------------------------------------------------------------------------------------------|------------------------------------------------------------------------------------------------------------|----------------------------------------------|-----|
| system<br>$X_c^-$<br>(xCT) | 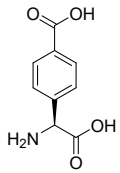 <p><b>33</b><br/>(<i>S</i>)-4-Carboxylphenylglycine</p> |  <p><b>32</b><br/>L-Phenylglycine</p> | A competitive non-substrate inhibitor;<br>Enhancing apparent binding affinity<br>( $K_i = 5 \mu\text{M}$ ) | LRM55 and SNB-19 glioma cells<br>(in-vitro)  | 166 |
|                            |  <p><b>35</b><br/>Capsazepine (CPZ)</p>                  |  <p><b>34</b><br/>Capsaicin</p>      | Inhibition of cysteine uptake<br>( $\text{IC}_{50} = \sim 3 \mu\text{M}$ );<br>Increasing ROS levels       | Cancer-induced bone pain (CIBP)<br>(In vivo) | 167 |

**Table S3.** Natural Products-Based Inhibitors Modulating Arginine Metabolism

| Enzyme | Structure and Name                                                                                                                                                | Natural Source                                                                                                     | Chemical development                                                                                                                                                                                                                                                   | Ref.    |
|--------|-------------------------------------------------------------------------------------------------------------------------------------------------------------------|--------------------------------------------------------------------------------------------------------------------|------------------------------------------------------------------------------------------------------------------------------------------------------------------------------------------------------------------------------------------------------------------------|---------|
| ARG1/2 | 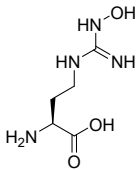 <p><b>37</b><br/><i>N<sup>o</sup></i>-Hydroxy-nor-L-arginine<br/>(Nor-NOHA)</p> |                                                                                                                    | Inhibition of ARG ( $IC_{50} = 2 \mu M$ for rARG, $50 \mu M$ for mARG);<br>Enhancing binding affinity ( $K_i = 0.5 \mu M$ , 20-fold than NOHA);<br>Anti-leukemic activity in hypoxia                                                                                   | 212-214 |
|        |  <p><b>38</b><br/>2(<i>S</i>)-Amino-6-borono-hexanoic Acid (ABH)</p>             |                                                                                                                    | First boronic acid-based ARG inhibitor;<br>High-affinity inhibition ( $IC_{50} = 0.8 \mu M$ for rARG, $K_d = 0.11 \mu M$ );<br>Nonadrenergic, noncholinergic (NANC) nerve-mediated cavernosal smooth muscle relaxation                                                 | 215-217 |
|        |  <p><b>39</b><br/><i>S</i>-(2-Boronoethyl)-L-cysteine (BEC)</p>                 |  <p><b>36</b><br/>L-Arginine</p> | High-affinity inhibition ( $K_i = 0.4-0.6 \mu M$ , $K_d = 2.22 \mu M$ );<br>NO-mediated cavernosal smooth muscle relaxation                                                                                                                                            | 218     |
|        |  <p><b>40</b><br/>Numidargistat/CB-1588</p>                                    |                                                                                                                    | Dual ARG1/2 inhibitor;<br>Enhancing ARG inhibition ( $IC_{50} = 20 nM$ for hARG1, $39 nM$ for hARG2);<br>Antitumor activity for glioma, melanoma, leukemia, ovarian, lung, and colon cancer;<br>First-in-human (FIH) Phase I trial in advanced/metastatic solid tumors | 219-222 |
|        |  <p><b>41</b><br/>OATD-02</p>                                                  |                                                                                                                    | Potent ARG inhibition ( $IC_{50} = 86 nM$ for ARG1, $296 nM$ for ARG2);<br>Antitumor activity for lung, colon, and breast cancer;<br>Phase 1/2 trials evaluating monotherapy and combination with immune checkpoint inhibitors in advanced solid tumors                | 223     |

|        |                                                                                                                                                                                                                                      |                                                                                                                     |                                                                                                                                                                                                             |          |
|--------|--------------------------------------------------------------------------------------------------------------------------------------------------------------------------------------------------------------------------------------|---------------------------------------------------------------------------------------------------------------------|-------------------------------------------------------------------------------------------------------------------------------------------------------------------------------------------------------------|----------|
| ARG1/2 | 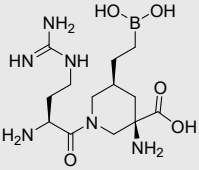 <p><b>42</b><br/>(3<i>R</i>,5<i>S</i>)-3-amino-1-((<i>S</i>)-2-amino-4-guanidino butanoyl)-5-(2-boronoethyl)piperidine-3-carboxylic acid (A17)</p> |  <p><b>36</b><br/>L-Arginine</p>   | <p>First boronic acid-based piperidine analogue ARG inhibitor;<br/>Low cellular permeability;<br/>Selective targeting extracellular ARG;<br/>High oral bioavailability;<br/>No potential cardiotoxicity</p> | 224      |
| NOS    |  <p><b>43</b><br/><i>N</i><sup>ω</sup>-Allyl-L-arginine (L-ALA)</p>                                                                                 |                                                                                                                     | <p>Both reversible (<math>K_i = 2.1 \mu\text{M}</math>) and irreversible inhibition (<math>K_i = 3.4 \mu\text{M}</math>) for iNOS</p>                                                                       | 225, 226 |
|        |  <p><b>44</b><br/><i>N</i><sup>ω</sup>-Cyclopropyl-L-arginine (L-CPA)</p>                                                                          |  <p><b>36</b><br/>L-Arginine</p> | <p>Reversible inhibitor for iNOS (<math>K_i = 7.7 \mu\text{M}</math>)</p>                                                                                                                                   | 225      |
|        |  <p><b>45</b><br/><i>N</i><sup>ω</sup>-Propyl-L-arginine</p>                                                                                      |  <p><b>36</b><br/>L-Arginine</p> | <p>Remarkable selectivity for nNOS (<math>K_i = 57 \text{ nM}</math>)</p>                                                                                                                                   | 226      |
|        |  <p><b>46</b><br/>L-<i>N</i><sup>5</sup>-(1-iminoethy)ornithine (L-NIO)</p>                                                                       |                                                                                                                     | <p>Potent inhibition for eNOS</p>                                                                                                                                                                           | 227-229  |
| NOS    |                                                                                                                                                                                                                                      |  <p><b>36</b><br/>L-Arginine</p> | <p>Strong inhibitory selectivity</p>                                                                                                                                                                        | 230      |

|                                                                                                                                                                            |                                                                                                                        |                                                                                                       |     |
|----------------------------------------------------------------------------------------------------------------------------------------------------------------------------|------------------------------------------------------------------------------------------------------------------------|-------------------------------------------------------------------------------------------------------|-----|
| 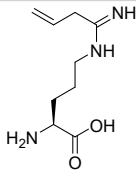 <p><b>47</b><br/> <i>N</i><sup>5</sup>-(1-Imino-3-butenyl)-L-ornithine (Vinyl-L-NIO)</p> |                                                                                                                        | for nNOS ( <i>K</i> <sub>i</sub> of 100 nM)                                                           |     |
|  <p><b>48</b><br/> L-<i>N</i><sup>6</sup>-(1-Iminoethyl)lysine (L-NIL)</p>                |                                                                                                                        | Potent selective inhibitor for iNOS<br>(IC <sub>50</sub> = 3.3 μM for iNOS,<br>92 μM for nNOS)        | 231 |
|  <p><b>49</b><br/> GW273629</p>                                                          |                                                                                                                        | Enhancing iNOS selectivity<br>(IC <sub>50</sub> = 8.0 μM for iNOS,<br>125-fold selectivity over eNOS) | 232 |
|  <p><b>50</b><br/> GW274150</p>                                                         |                                                                                                                        | Enhancing iNOS selectivity<br>(IC <sub>50</sub> = 1.4 μM for iNOS,<br>333-fold selectivity over eNOS) | 232 |
|  <p><b>52</b><br/> L-Thiocitrulline</p>                                                 |  <p><b>51</b><br/> L-Citrulline</p> | First citrulline analogue NOS inhibitor;<br>Inhibition of bNOS (91%) and<br>iNOS(87%) at 100 μM       | 233 |

|     |                                                                                                                                                                              |                                                                                                                      |                                                                                                                                                                                                                                                                                                                                                                                                                        |             |
|-----|------------------------------------------------------------------------------------------------------------------------------------------------------------------------------|----------------------------------------------------------------------------------------------------------------------|------------------------------------------------------------------------------------------------------------------------------------------------------------------------------------------------------------------------------------------------------------------------------------------------------------------------------------------------------------------------------------------------------------------------|-------------|
| NOS | 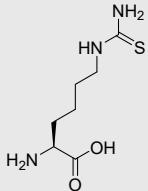 <p><b>53</b><br/>L-Homothiocitrulline</p>                                                  |                                                                                                                      | First citrulline analogue NOS inhibitor;<br>Inhibition of bNOS (93%)<br>and iNOS(75%) at 100 $\mu$ M                                                                                                                                                                                                                                                                                                                   | 233         |
|     |  <p><b>54</b><br/>S-Methyl-L-thiocitrullin<br/>(S-MTC)</p>                                  |  <p><b>51</b><br/>L-Citrulline</p>  | First citrulline analogue NOS inhibitor;<br>Inhibition of bNOS (96%) and<br>iNOS(87%) at 10 $\mu$ M;<br>Potent and selective inhibitor for nNOS<br>( $K_i$ = 1.2 nM for nNOS<br>and 11 nM for eNOS);<br>Potent inhibitory activity <i>in vivo</i><br>(rat model)<br>(IC <sub>50</sub> values: 0.047 $\mu$ M for nNOS (brain<br>cytosol), 0.31 $\mu$ M for nNOS (brain<br>slices), 5.4 $\mu$ M for eNOS (aortic rings)) | 233,<br>234 |
|     |  <p><b>55</b><br/>S-Ethyl-L-thiocitrullin<br/>(S-ETC)</p>                                  |                                                                                                                      | Potent and selective inhibitor for nNOS<br>( $K_i$ = 0.5 nM for nNOS<br>and 24 nM for eNOS);<br>Potent inhibitory activity <i>in vivo</i><br>(rat model)<br>(IC <sub>50</sub> values: 0.073 $\mu$ M for nNOS (brain<br>cytosol), 1.2 $\mu$ M for nNOS (brain slices),<br>7 $\mu$ M for eNOS (aortic rings))                                                                                                            | 234         |
| ODC |  <p><b>57</b><br/><math>\alpha</math>-Difluoromethylornithine<br/>(DFMO/Eflornithine)</p> |  <p><b>56</b><br/>L-Ornithine</p> | Clinical trials in anaplastic glioma<br>and colon cancer;<br>Inhibition of tumor progression<br>to pancreatic ductal adenocarcinoma<br>(PDAC);<br>Approved for the treatment of late-stage<br><i>Trypanosoma brucei gambiense</i><br>infections in 1990;<br>Approved as an oral maintenance therapy<br>for adult and pediatric patients with<br>high-risk neuroblastoma (HRNB)                                         | 235-<br>244 |

**Table S4.** Natural Products-Based Inhibitors Modulating Tryptophan Metabolism>

| Enzyme | Structure and Name                                                                                                                                               | Natural Source                                                                                                             | Chemical development                                                                                                                                                                                                                                                                                                  | Ref.    |
|--------|------------------------------------------------------------------------------------------------------------------------------------------------------------------|----------------------------------------------------------------------------------------------------------------------------|-----------------------------------------------------------------------------------------------------------------------------------------------------------------------------------------------------------------------------------------------------------------------------------------------------------------------|---------|
| IDO1   | 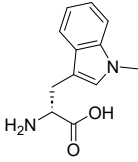 <p><b>59</b><br/>1-Methyl-D-tryptophan<br/>(D-1-MT/Indoximod/<br/>NLG8189)</p> |  <p><b>58</b><br/>D/L-Tryptophan</p>      | Potent immunomodulator via non-enzymatic mTORC1 pathway activation ( $IC_{50} \approx 70$ nM); Antitumor activity in HER2-driven breast cancer, prostate cancer, metastatic melanoma, pediatric brain tumor (DIPG); Synergistic effects with chemotherapy and checkpoint inhibitors demonstrated in Phase I/II trials | 299-303 |
|        |  <p><b>60</b><br/>Ethyl leucyl-1-methyl-D-tryptophanate<br/>(NLG-802)</p>       |                                                                                                                            | Optimized prodrug of indoximod for enhanced oral bioavailability (5-fold than indoximod); Enhanced $C_{max}$ and AUC; Favorable toxicology profile (NOAEL 120 mg/kg BID in non-human primates); Superior antitumor efficacy in murine melanoma models via enhanced T cell-mediated responses                          | 304     |
|        |  <p><b>62</b><br/>Tsitsikammamine A analogue</p>                              |  <p><b>61</b><br/>Tsitsikammamine A</p> | Potent IDO1 enzymatic inhibition ( $IC_{50} = 0.9$ $\mu$ M)                                                                                                                                                                                                                                                           | 305     |
|        |  <p><b>64</b><br/>5-Br-brassinin</p>                                          |  <p><b>63</b><br/>Brassinin</p>         | Competitive IDO1 inhibitor ( $K_i = 24.5$ $\mu$ M); Orally bioavailable with superior pharmacokinetics ( $T_{max} = 526.3$ min and $AUC_{\infty} = 1485$ $\mu$ g·min/mL); Selective for IDO over TDO2; Enhancing tumor regression in combination with paclitaxel                                                      | 306     |
| TDO    |  <p><b>66</b><br/>Tryptanthrin derivatives</p>                                |  <p><b>65</b><br/>Tryptanthrin</p>      | Potent uncompetitive TDO inhibitor ( $IC_{50} = 0.937 \pm 0.215$ $\mu$ M; $K_i = 0.356 \pm 0.078$ $\mu$ M); Robust cellular inhibition ( $IC_{50} = 0.054$ $\mu$ M in U87 MG cells; $0.053$ $\mu$ M in HEK293-hTDO cells)                                                                                             | 307     |

|                     |                                                                                                                                                            |                                                                                                                      |                                                                                                                                                                                                                                                                                                                                                                                                                                                                                                                          |                     |
|---------------------|------------------------------------------------------------------------------------------------------------------------------------------------------------|----------------------------------------------------------------------------------------------------------------------|--------------------------------------------------------------------------------------------------------------------------------------------------------------------------------------------------------------------------------------------------------------------------------------------------------------------------------------------------------------------------------------------------------------------------------------------------------------------------------------------------------------------------|---------------------|
|                     | 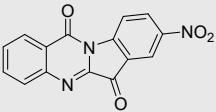 <p><b>67</b><br/>Tryptanthrin derivatives</p>                            |  <p><b>65</b><br/>Tryptanthrin</p>  | <p>Potent uncompetitive TDO inhibitor<br/>(<math>IC_{50} = 0.101 \pm 0.062 \mu M</math>;<br/><math>K_i = 0.215 \pm 0.020 \mu M</math>);<br/>Robust cellular inhibition<br/>(<math>IC_{50} = 0.040 \mu M</math> in U87 MG cells;<br/><math>0.061 \mu M</math> in HEK293-hTDO cells)</p>                                                                                                                                                                                                                                   | 307                 |
| IDO/<br>TDO<br>dual |  <p><b>68</b><br/>Tryptanthrin derivative</p>                             |                                                                                                                      | <p>Potent IDO1 inhibition<br/>(<math>IC_{50} = 0.534 \mu M</math> for rhIDO1,<br/><math>0.023 \mu M</math> in HEK293-IDO1 cells);<br/>Moderate TDO inhibition<br/>(<math>IC_{50} = 0.937 \pm 0.148 \mu M</math>);<br/>Enhanced T cell proliferation and<br/>antitumor activity in LLC (Lewis<br/>lung cancer) tumor model;<br/>62% tumor volume reduction and<br/>Treg depletion <i>in vivo</i>.</p>                                                                                                                     | 283,<br>285,<br>307 |
|                     |  <p><b>69</b><br/>Tryptanthrin derivative</p>                             |  <p><b>65</b><br/>Tryptanthrin</p> | <p>Potent IDO1/TDO dual inhibition<br/>(IDO1 enzymatic <math>IC_{50} = 0.50 \mu M</math>;<br/>cellular <math>IC_{50} = 0.02 \mu M</math> / TDO<br/>enzymatic <math>IC_{50} = 0.76 \mu M</math>; cellular<br/><math>IC_{50} = 0.09 \mu M</math>);<br/>Uncompetitive inhibition with <math>K_i =</math><br/><math>2.64 \mu M</math> (IDO1); <math>0.31 \mu M</math> (TDO);<br/>Enhanced T cell proliferation and<br/>superior efficacy over L-1-MT;<br/>Tumor volume reduction (56.2%<br/>in LLC, 47.3% in H22 models)</p> | 308                 |
|                     |  <p><b>70</b><br/>Tryptanthrin derivative</p>                           |                                                                                                                      | <p>Potent IDO1/TDO dual inhibition<br/>(IDO1 <math>IC_{50} = 0.46 \mu M</math>;<br/>TDO <math>IC_{50} = 0.06 \mu M</math>);<br/>IDO1 inhibitory activity in HeLa<br/>cells (<math>IC_{50} = 0.16 \mu M</math>)</p>                                                                                                                                                                                                                                                                                                       | 285                 |
|                     |  <p><b>71</b><br/>Tryptanthrin derivative</p>                           |                                                                                                                      | <p>Potent IDO1/TDO dual inhibition<br/>(IDO1 <math>IC_{50} = 0.12 \mu M</math>;<br/>TDO <math>IC_{50} = 0.03 \mu M</math>);<br/>IDO1 inhibitory activity<br/>in HeLa cells (<math>IC_{50} = 0.06 \mu M</math>)</p>                                                                                                                                                                                                                                                                                                       | 285                 |
|                     |  <p><b>73</b><br/>1-(1H-Imidazole-5-yl)-9H-<br/>pyrido[3,4-b]indole</p> |  <p><b>72</b><br/>Norharmane</p>  | <p>Potent IDO1/TDO dual inhibition<br/>(IDO1 <math>IC_{50} = 3.53 \pm 0.81 \mu M</math>;<br/>TDO <math>IC_{50} = 1.15 \pm 0.09 \mu M</math>);<br/>Anti-inflammatory effects in LPS-<br/>induced BV2 microglial cells;<br/>High plasma exposure (<math>AUC_{0-\infty} =</math><br/><math>4464.9 h \cdot ng/mL</math>); Moderate oral<br/>bioavailability (<math>F = 52.55\%</math>);<br/>Amelioration of depressive-like<br/>behaviors in LPS-induced mouse<br/>model</p>                                                 | 309                 |

|      |                                                                                                                                                                        |                                                                                                                       |                                                                                                                                                                                                                                                                                                                                                                               |             |
|------|------------------------------------------------------------------------------------------------------------------------------------------------------------------------|-----------------------------------------------------------------------------------------------------------------------|-------------------------------------------------------------------------------------------------------------------------------------------------------------------------------------------------------------------------------------------------------------------------------------------------------------------------------------------------------------------------------|-------------|
| KATH | 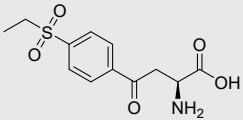 <p><b>75</b><br/>(<i>S</i>)-4-(Ethylsulfonyl)<br/>benzoylalanine (<i>S</i>-ESBA)</p> |  <p><b>74</b><br/>L-Kynurenine</p>   | <p>First synthetic selective KAT II inhibitor (<math>IC_{50} = 6.1 \mu M</math>);<br/>Selective inhibition without affecting KAT I, KMO, or KYNU;<br/>Decreased extracellular KYNA levels in rat hippocampus</p>                                                                                                                                                              | 310         |
| KMO  |  <p><b>76</b><br/><i>m</i>-Nitrobenzoylalanine<br/>(<i>m</i>-NBA)</p>                 |  <p><b>74</b><br/>L-Kynurenine</p> | <p>Potent KMO inhibition (<math>IC_{50} = 0.9 \pm 0.1 \mu M</math>);<br/>High selectivity over KYNU (<math>IC_{50} = 100 \pm 12 \mu M</math>);<br/>In vivo elevation of KYN (13-fold) and KYNA (up to 5-fold) in rat brain, liver, and blood;<br/>Increased hippocampal extracellular KYNA;<br/>Dose-dependent sedative and anticonvulsant effects in rats and DBA-2 mice</p> | 311         |
|      |  <p><b>77</b><br/>(<i>R,S</i>)-3,4-dichlorobenzoylalanine<br/>(FCE 28833A)</p>        |                                                                                                                       | <p>Potent KMO inhibition (<math>IC_{50} = 0.2 \pm 0.02 \mu M</math>);<br/>15-fold greater potency than <i>m</i>-NBA;<br/>Sustained 10- to 80-fold elevation of hippocampal extracellular KYNA</p>                                                                                                                                                                             | 312         |
|      |  <p><b>78</b><br/>CHDI-340246</p>                                                   |                                                                                                                       | <p>Subnanomolar KMO inhibition (<math>IC_{50} = 0.5\text{-}0.6 \text{ nM}</math>);<br/>Excellent selectivity over KATs and KYNU;<br/>Favorable pharmacokinetics (oral bioavailability ~64%, low plasma clearance 291 mL/h/kg)</p>                                                                                                                                             | 313         |
|      |  <p><b>79</b><br/>GSK180</p>                                                        |                                                                                                                       | <p>Nanomolar KMO inhibition (<math>IC_{50} \approx 6 \text{ nM}</math>);<br/>Protection against lung, kidney, and liver injury in AP-MODS rodent models</p>                                                                                                                                                                                                                   | 314,<br>315 |
|      |  <p><b>80</b><br/>GSK065</p>                                                        |                                                                                                                       | <p>Potent KMO inhibition (<math>pIC_{50} = 8.3</math>; cellular <math>pIC_{50} = 8.5</math>);<br/>Picomolar affinity (<math>K_i \approx 50 \text{ pM}</math>) with slow dissociation kinetics (<math>T_{1/2} \approx 10 \text{ h}</math>);<br/>Favorable PK (low clearance, high exposure);<br/>Protective effects in rat model of acute pancreatitis (AP)</p>                | 315,<br>316 |



|  |                                                                                                               |                                                                                                                     |                                                                                                                                                                                                                                                                          |                     |
|--|---------------------------------------------------------------------------------------------------------------|---------------------------------------------------------------------------------------------------------------------|--------------------------------------------------------------------------------------------------------------------------------------------------------------------------------------------------------------------------------------------------------------------------|---------------------|
|  | 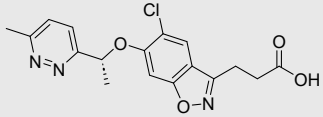 <p><b>81</b><br/>GSK366</p> |  <p><b>74</b><br/>L-Kynurenine</p> | <p>Potent KMO inhibition<br/> (<math>IC_{50}</math> = 2.3 nM for hKMO;<br/> 0.7 nM for Pf-KMO);<br/> High affinity (<math>K_i</math> <math>\approx</math> 12 pM)<br/> with a prolonged dissociation half-<br/> life (<math>T_{1/2}</math> <math>\approx</math> 12 h)</p> | <p>315,<br/>316</p> |
|--|---------------------------------------------------------------------------------------------------------------|---------------------------------------------------------------------------------------------------------------------|--------------------------------------------------------------------------------------------------------------------------------------------------------------------------------------------------------------------------------------------------------------------------|---------------------|
